# Supplementary material for: A hierarchical composite of GeO2 nanotubes/N-doped carbon microspheres with high-rate and super-durable performance for lithium-ion batteries
Source: Royal Society of Chemistry journal article supplement (doi:10.1039/c9cc06921f), 2019-01-01
Supplement: c9cc06921f1.pdf [file c9cc06921f1.pdf]

## Supporting Information

### **Hierarchical Composite of GeO<sub>2</sub> Nanotubes/N-doped Carbon Microspheres with High-Rate and Super-Durable Performance for Lithium-Ion Batteries**

Lijing Han,<sup>a, b</sup> Jing Tang,<sup>b</sup> Qiaohua Wei,<sup>b\*</sup> Congrong Chen,<sup>a</sup> Mingdeng Wei<sup>a, c\*</sup>

<sup>a</sup> Fujian Provincial Key Laboratory of Electrochemical Energy Storage Materials, Fuzhou University, Fujian 350116, China

<sup>b</sup> Ministry of Education Key Laboratory for Analytical Science of Food Safety and biology, Fujian Provincial Key Laboratory of Analysis and Detection Technology for Food Safety, Fuzhou University, Fuzhou, Fujian 350116, China

<sup>c</sup> Jiangsu Collaborative Innovation Center of Photovoltaic Science and Engineering, Changzhou, 213164, China

\* Corresponding authors. E-mail addresses: qhw76@fzu.edu.cn; [wei-mingdeng@fzu.edu.cn](mailto:wei-mingdeng@fzu.edu.cn)

## Experimental Section

### Synthesis of $\text{GeO}_2/\text{NCS}$ and $\text{GeO}_2/\text{NCT}$ :

The 3D organic germanium precursors  $[\text{Ge}(\text{C}_6\text{H}_4\text{O}_2)_2(\text{bpy})]$  was prepared according to a modified method in a previous report.<sup>1</sup> Typically, 5 mmol of  $\text{GeO}_2$  and 10 mmol of catechol were dispersed in 100 ml of deionized water, the mixture was placed in an oil bath at 105 °C for 2.5 h, When the temperature cooled down to 80 °C, 8 g of PVP and 5 mmol of 2,2-bipyridyl (bpy) were added under strong magnetic stirring, After 2 h, a yellow suspension was obtained by centrifugation, and then washed with deionized water and ethanol by several times, and drying under vacuum at 70 °C. The resulting organic germanium precursor was placed into a 30 ml crucible without a crucible lid in a muffle furnace and heated at 500 °C for 2 h with a rate of 5 °C min<sup>-1</sup>.

As a control,  $\text{GeO}_2/\text{NCT}$  was fabricated in the same way as the  $\text{GeO}_2/\text{NCS}$  without adding PVP in the synthetic process.

### Electrochemical test

The electrochemical properties of as-prepared samples were tested using 2025-type coin cells assembled in argon-filled glove box with oxygen and  $\text{H}_2\text{O}$  level below 0.1 ppm. Working electrodes were fabricated by mixing the active materials, carbon black, and polyvinylidene fluoride (PVDF) at a weight ratio of 8:1:1 in N-methylpyrrolidone (NMP). The obtained slurries were cast onto a copper current collector, and then dried overnight at 110 °C under vacuum. The mass loading of all electrodes was 0.7 mg/ cm<sup>2</sup>. Electrochemical cells were assembled with the cast electrode, Li metal as both counter and reference electrodes, a microporous polypropylene membrane (Celgard 2400) was employed as the separator. The electrolyte was 1 M  $\text{LiPF}_6$  in ethylene carbonate (EC), dimethyl carbonate (DMC), methyl ethyl carbonate (EMC) (1:1:1, by volume), and 6 wt% fluoride ethylene carbonate (FEC). All cells were cycled between 0.01 and 1.5 V versus  $\text{Li}/\text{Li}^+$ . Cyclic voltammetry (CV) and charge-discharge tests of all electrodes were performed using an electrochemical workstation (CHI 600 C) and Land automatic batteries tester (Land, CT 2001A, Wuhan, China), respectively.

### Material characterization

TEM analysis was performed using a Scanning electron microscopy (SEM, Hitachi S4800 instrument) and transmission electron microscopy (TEM, Tecnai G2 F20 instrument FEI, USA) were applied for the determination of the morphology of samples. X-ray diffraction (XRD) patterns of samples were recorded on a Rigaku Ultima IV X-ray diffractometer by using  $\text{Cu K}\alpha$  radiation at a voltage of 40 KV and a current of 20 mA. FT-IR spectra were recorded on a BRUKER-EQUINOX-55 IR spectrophotometer and Raman spectra were conducted in a Renishaw in Via Raman microscope with a 532 nm laser. XPS spectra were analyzed use ESCALAB 250 confirm the chemical composition of samples.  $\text{N}_2$  adsorption-desorption was performed on a Micromeritics ASAP 2020 instrument (Micromeritics, Norcross, GA, USA) at 77 K. Brunauer-Emmett-Teller (BET) and Barrett-Joyner-Halenda (BJH) analyses were used to calculate the specific surface area, and the corresponding pore size distribution. Thermogravimetric analysis (TGA) was characterized on CHNS/O analyzer (PE 2400II, Perkin-Elmer) by heating the samples in air up to 900 °C with a heating rate of 5 °C min<sup>-1</sup> in order to determine the amount of germanium oxide residue in the powders.

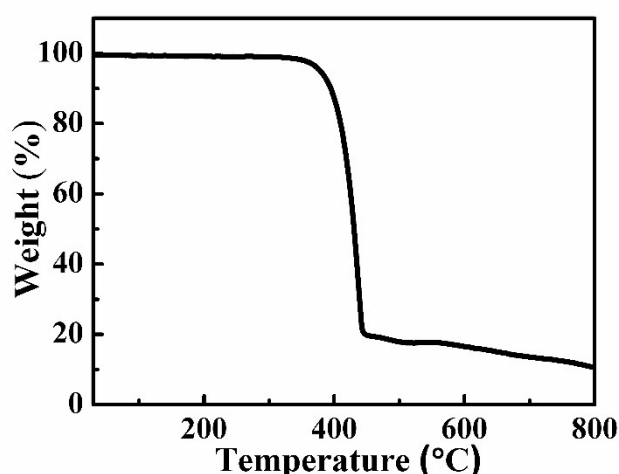

**Fig. S1** TG curves of the 3D organic germanium complexes.

Fig. S1 shows the TGA curve of the precursor  $\text{Ge}(\text{C}_6\text{H}_4\text{O}_2)_2(\text{bpy})$ . It shows one major stage of weight loss. Decomposition process is attributed to the loss of physically absorbed water and removal of the carbon or nitrogen on the form of  $\text{CO}$ ,  $\text{CO}_2$  and  $\text{NO}_2$  gases, started at 343 °C and lasted up to 453 °C, resulting from the decomposition of the organic ligands. In addition, it loses smaller weight due to the reaction of the carbon with oxygen when the temperature beyond 453 °C. Hence, the thermal behavior of the precursors can be expressed by the following reactions:<sup>2-4</sup>

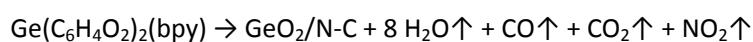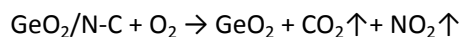

According to the above results, the calcination temperature was set at 500 °C, which can maintain a small amount of nitrogen-doped carbon to improve the stability and conductivity of the anode material.

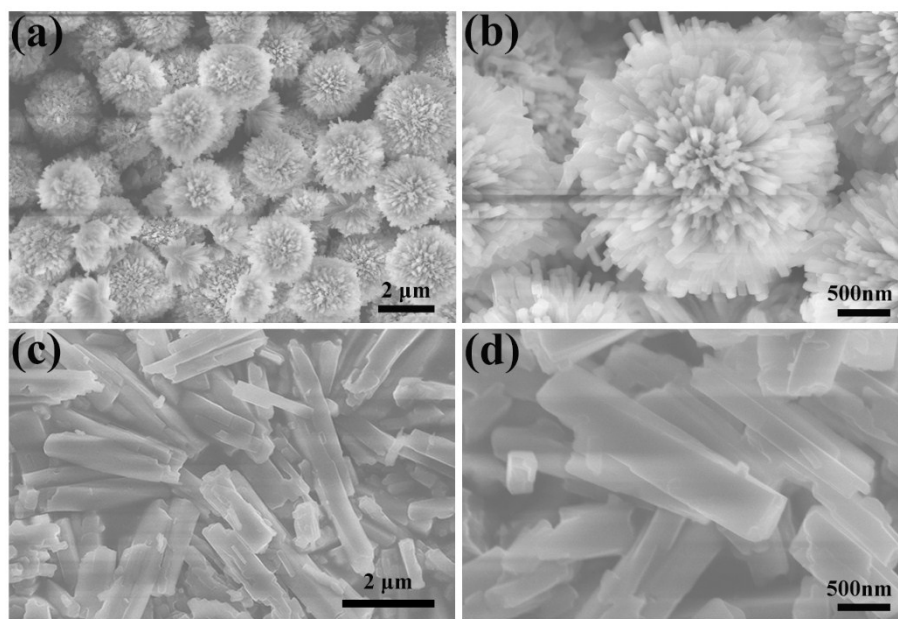

**Fig. S2** SEM images of the organic germanium complexes: (a, b) 3D and (c, d) 1D.

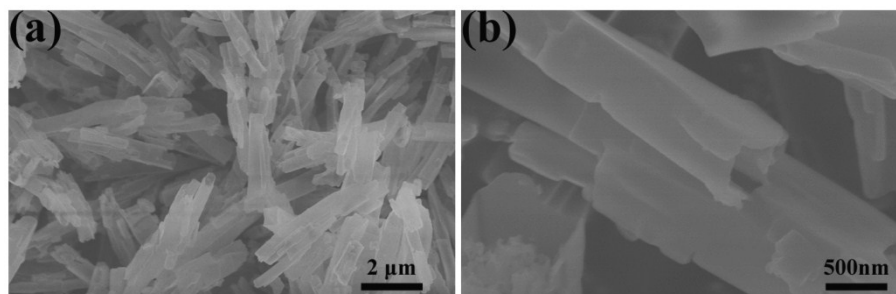

**Fig. S3** (a, b) SEM images of the GeO<sub>2</sub>/NCT.

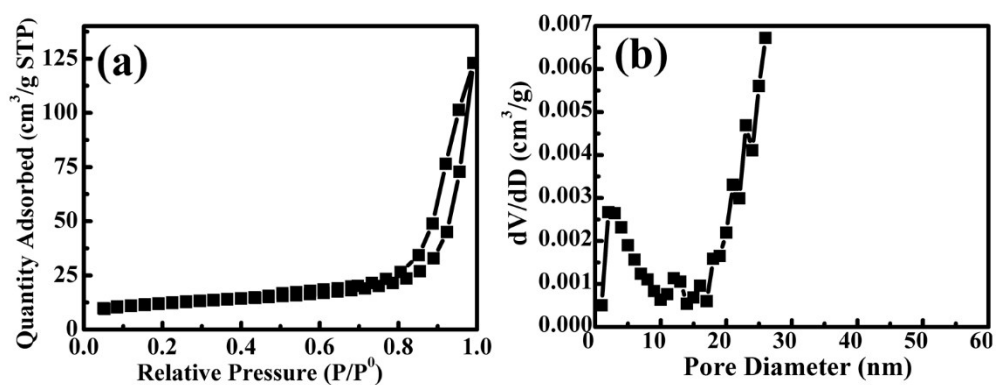

**Fig. S4** (a) N<sub>2</sub> adsorption-desorption isotherms and (b) pore size distribution from the adsorption branch through the BJH method of GeO<sub>2</sub>/NCS.

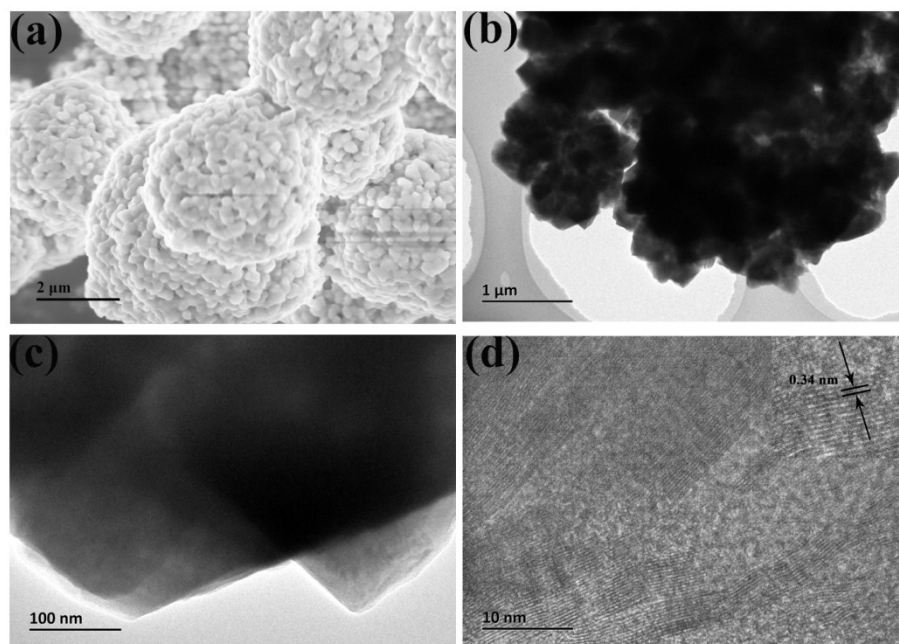

**Fig. S5** (a) SEM image, (b-d) TEM images of  $\text{GeO}_2$  calcined at 600  $^{\circ}\text{C}$  (inset: HRTEM image).

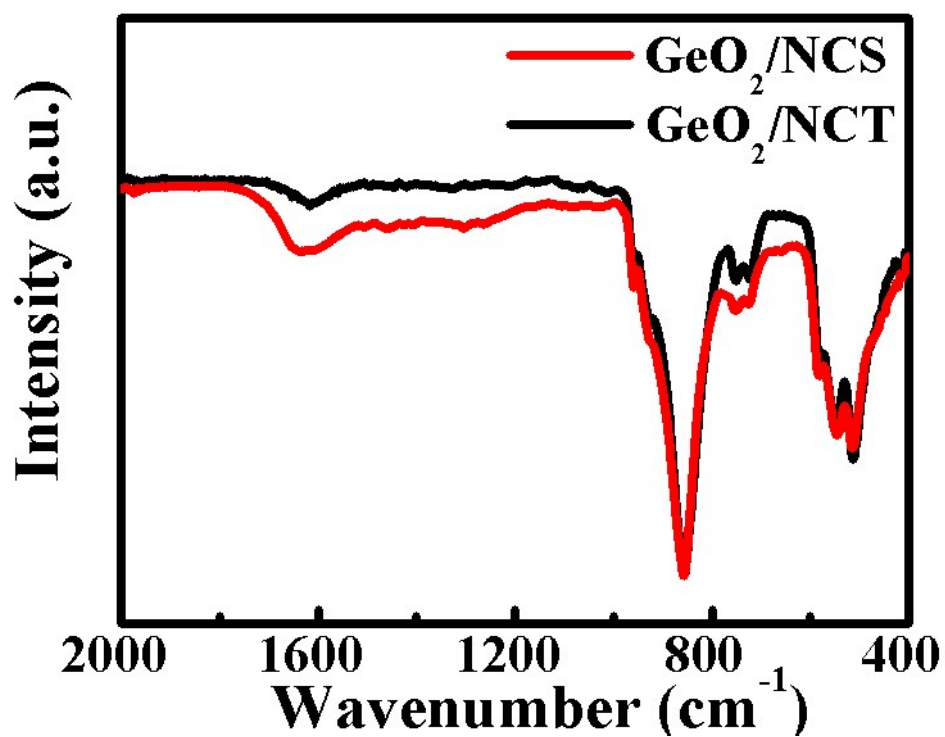

**Fig. S6** FTIR spectra of the GeO<sub>2</sub>/NCS and GeO<sub>2</sub>/NCT composites.



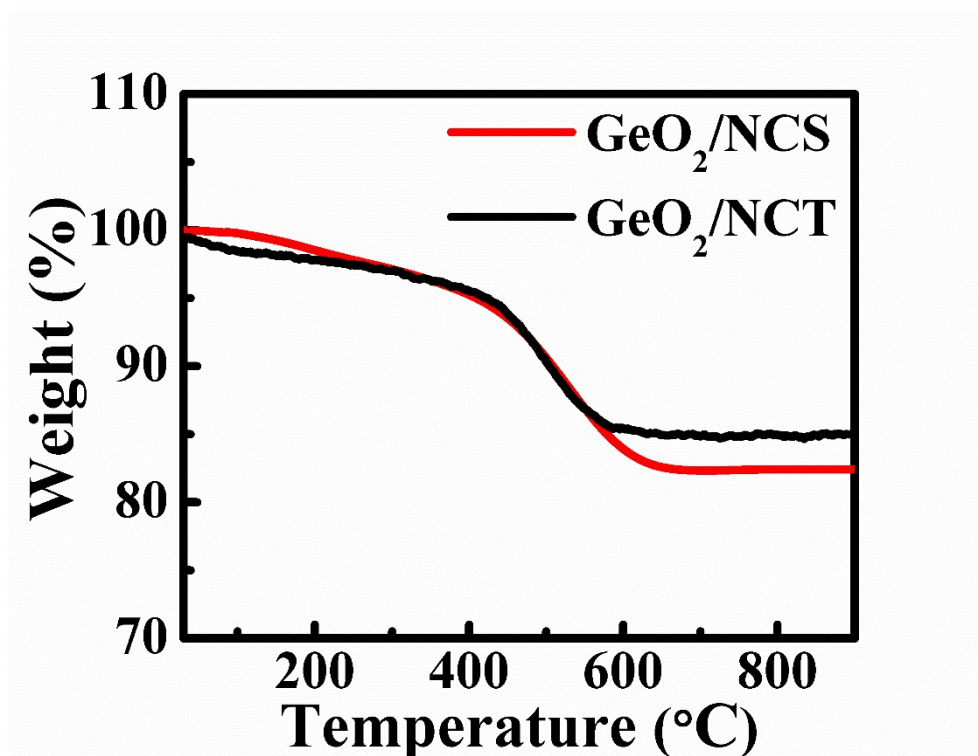

Fig. S7 TG curves of the GeO<sub>2</sub>/NCS and GeO<sub>2</sub>/NCT composites.

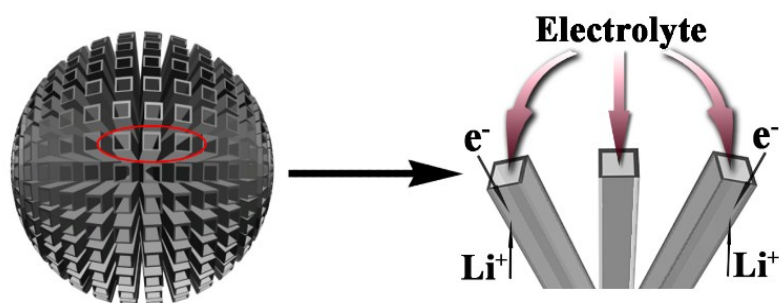

**Fig. S8** Transport path of lithium ions and electrons in  $\text{GeO}_2/\text{NCS}$  composite.

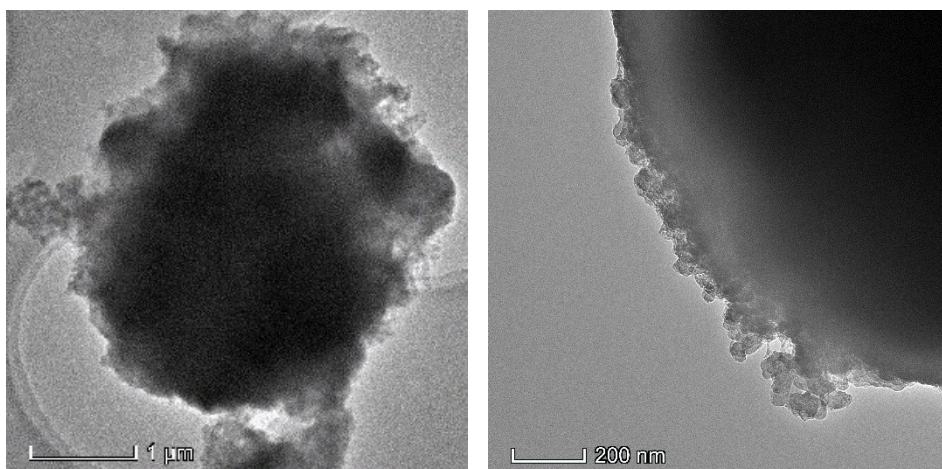

**Fig. S9** The TEM images of GeO<sub>2</sub>/NCS after 500 cycles at 1 A g<sup>-1</sup>.

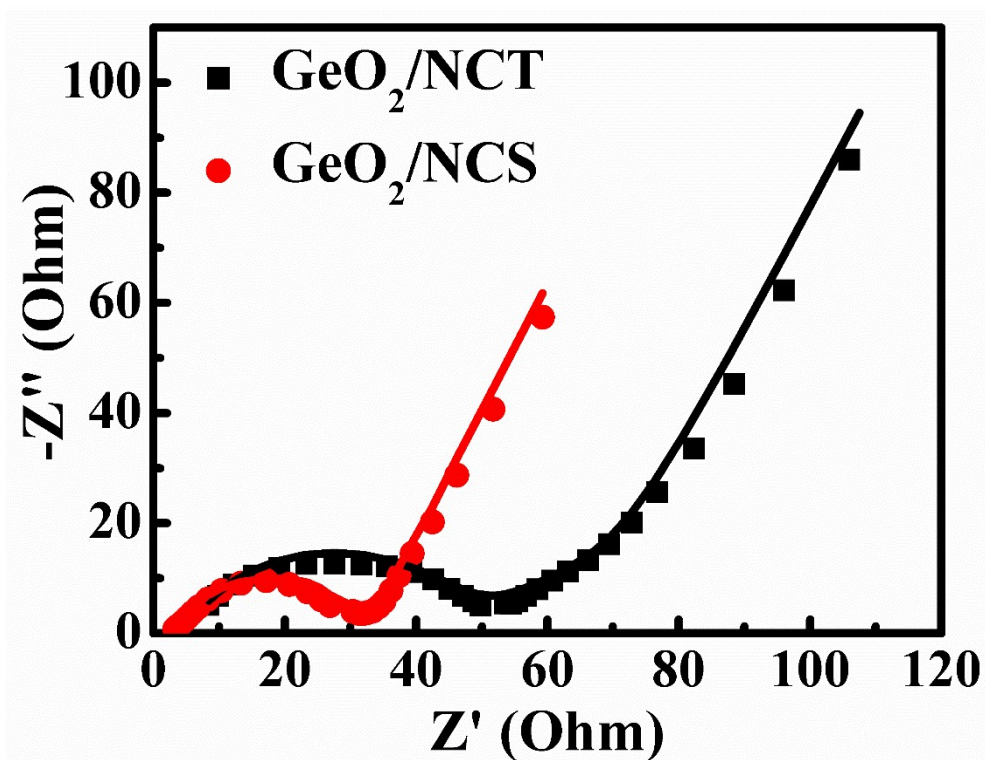

**Fig. S10** Electrochemical impedance spectra of GeO<sub>2</sub>/NCS and GeO<sub>2</sub>/NCT after 100 cycles.

**Table. S1** comparison of electrochemical properties of GeO<sub>2</sub> anodes.

| Anode                      | Voltage range (V) | Cycle stability                       |                             |                                        | Ref.                                              |
|----------------------------|-------------------|---------------------------------------|-----------------------------|----------------------------------------|---------------------------------------------------|
|                            |                   | Current Density (mA g <sup>-1</sup> ) | After n <sup>th</sup> cycle | Charge capacity (mAh g <sup>-1</sup> ) |                                                   |
| GeO <sub>2</sub> /NCS      | 0.01-1.5          | 200<br>1000                           | 100<br>500                  | 804<br>789                             | This work                                         |
| GeO <sub>2</sub> /Ge       | 0.01-1.5          | 500                                   | 100                         | 665.3                                  | <i>Adv. Funct. Mater.</i> , 2019, 1807946         |
| GeO <sub>2</sub> IO        | 0.01-1.5          | 150                                   | 250                         | 714                                    | <i>Nano Energy</i> , 2018, <b>43</b> , 11-21.     |
| Hexagonal GeO <sub>2</sub> | 0-1.5             | 200                                   | 50                          | 747                                    | <i>Nanoscale</i> , 2017, <b>9</b> , 3961          |
| rGO/GeO <sub>2</sub> /PANI | 0.005-2.0         | 100                                   | 100                         | 749                                    | <i>J. Power Sources</i> , 2016, <b>306</b> , 791  |
| Ge/GeO <sub>2</sub> /C     | 0.005-2.0         | 200                                   | 50                          | 915                                    | <i>Electrochim. Acta</i> , 2016, <b>188</b> , 120 |
| GeO <sub>2</sub> /C-N      | 0.01-1.5          | 550                                   | 400                         | 871                                    | <i>J. Mater. Chem. A</i> , 2015, <b>3</b> , 21722 |
| GeO <sub>2</sub> /C        | 0.01-1.5          | 550                                   | 200                         | 905                                    | <i>Nanoscale</i> , 2015, <b>7</b> , 2552          |
| CNT-GeO <sub>2</sub>       | 0.005-1.5         | 200                                   | 500                         | 813.7                                  | <i>New J. Chem.</i> , 2015, <b>39</b> , 689       |
| GeO <sub>2</sub>           | 0.01-1.5          | 100                                   | 50                          | 1340                                   | <i>Chem. Commun.</i> , 2014, <b>50</b> , 13956    |
| GeO <sub>2</sub> /MC       | 0.01-1.5          | 1500                                  | 380                         | 452                                    | <i>J. Power Sources</i> , 2014, <b>269</b> , 755  |
| GeO <sub>2</sub> /C        | 0-1.5             | 110                                   | 50                          | 697                                    | <i>Electrochim. Acta</i> , 2014, <b>116</b> , 203 |
| GeO <sub>2</sub>           | 0.005-1.5         | 565<br>1130                           | 100<br>500                  | 816<br>574                             | <i>Nano Lett.</i> , 2014, <b>14</b> , 1005        |
| GeO <sub>2</sub> /G        | 0.01-1.5          | 110<br>2200                           | 100<br>1000                 | 919<br>571                             | <i>Adv. Energy Mate</i> , 2013, <b>3</b> , 1269   |

## Notes and references

- 1 C. Jing, W. Li, L. Yang, Z. Shi, Q. Luo, *Chinese Journal of Inorganic Chemistry*, 1998, **14**, 261-265.
- 2 D. T. Ngo, R. S. Kalubarme, M. G. Chourashiya, C.-N. Park and C.-J. Park, *Electrochim. Acta*, 2014, **116**, 203-209.
- 3 W. Zhang, H. Pang, W. Sun, L.-P. Lv and Y. Wang, *Electrochem. Commun.*, 2017, **84**, 80-85.
- 4 J. Zhang, T. Yu, J. Chen, H. Liu, D. Su, Z. Tang, J. Xie, L. Chen, A. Yuan and Q. Kong, *Ceram. Int.*, 2018, **44**, 1127-1133.
